# Supplementary material for: Tackling psychosocial maladjustment in Parkinson’s disease patients following subthalamic deep-brain stimulation: A randomised clinical trial
Source: PubMed Central journal article supplement (PMC5388322; doi:10.1371/journal.pone.0174512), 2017-04-11
Supplement: pone.0174512.s002.pdf [file pone.0174512.s002.pdf]

# Psychoeducation programme Session 1

## Summary

- ❖ Surgical procedure
- ❖ Post-operative follow-up
- ❖ Post-operative expected results

## 1. Surgical procedure

### Stereotactic targeting

#### The day before surgery

- Stereotactic frame under local anesthesia

- Brain MRI

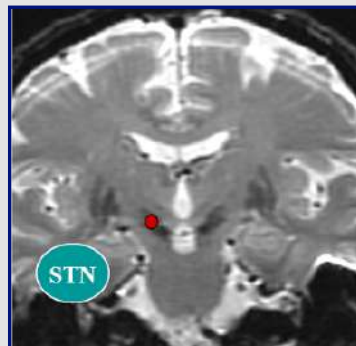

## Surgery

Under general anesthesia

### **Pictures of the drill hole**

Stereotactic frame and microelectrode recordings

### **Pictures of the patient with the frame and microdrive**

## Neuronal recordings

### Pictures of the microdrive on the patient's head

The subthalamic neuronal activity confirms the correct targeting

Microelectrode descent

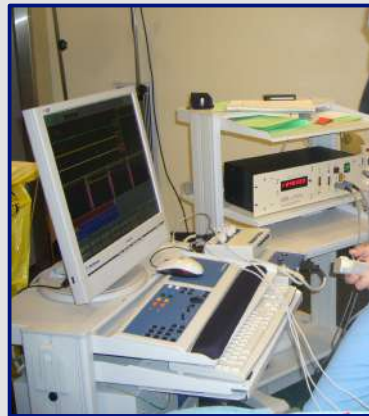

## Neurological testing

Peri-operative stimulation and testing in awake patient

### Pictures of the per-operative neurological testing

Clinical effect:

- Rigidity
- Akinesia
- Tremor

## Implantation of the definitive electrodes

Best clinical effect

### Pictures of the implantation of the definitive electrode

Electrode fixation

## Radiological control

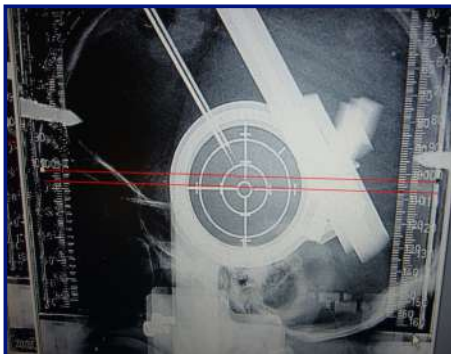

Definitive electrode position

During the microelectrode descent

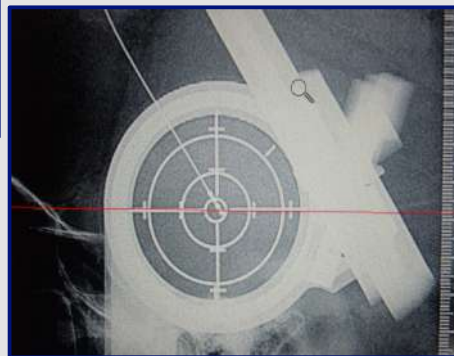

## Post-operative radiological control

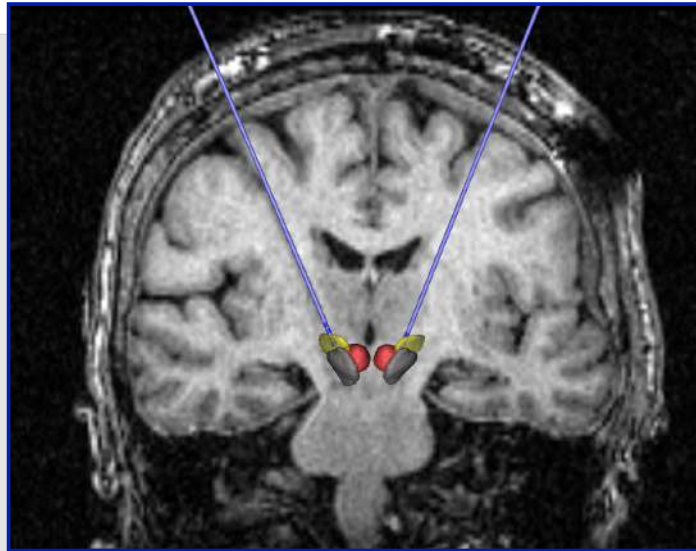

## Video of the surgical procedure

## Neurostimulator implantation

- Under general anesthesia  
The same day or few days later
- Connected to the electrodes with cables
- Localised within the subclavicular area

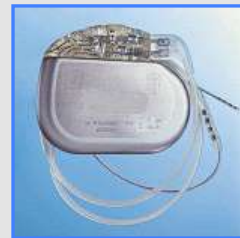

## Surgical complications

Rare = 2 to 5%

Usual with (brain) surgery

- Infection (5%)
- Brain Hemorrhage (0,5%)
- Epilepsy

## 2. Post-operative follow-up

### Parameter settings

- During hospitalisation
  - Transient lesioning effect
  - First parameter settings during hospitalisation
  - Concomittant reduction in the medical drug treatment dosage
- Outpatient visit follow-up
  - Progressive adjustment of parameter settings
  - Progressive optimisation of medical drug treatment



**Description du programmeur**  
 Identification des composants

La face arrière du programmeur N'Vision comporte le module de télémétrie et un aimant (facultatif), l'enrouleur du câble du module de télémétrie, le haut-parleur et le compartiment de la pile (Figure 2-2). Le stylet est rangé dans un renforcement du côté droit de l'appareil.

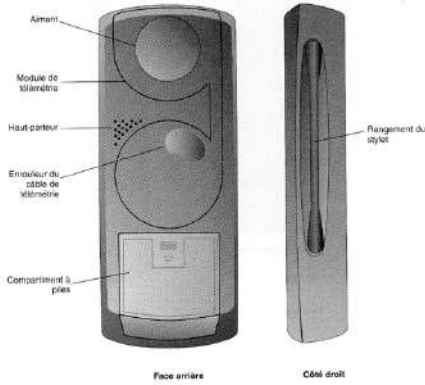

Figure 2-2. Vues de la face arrière et du côté droit du programmeur N'Vision

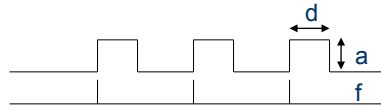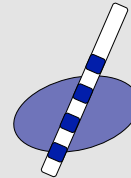

- Contact
- Frequency (f)
- Pulse width (d)
- Amplitude (a)

### Motor disability

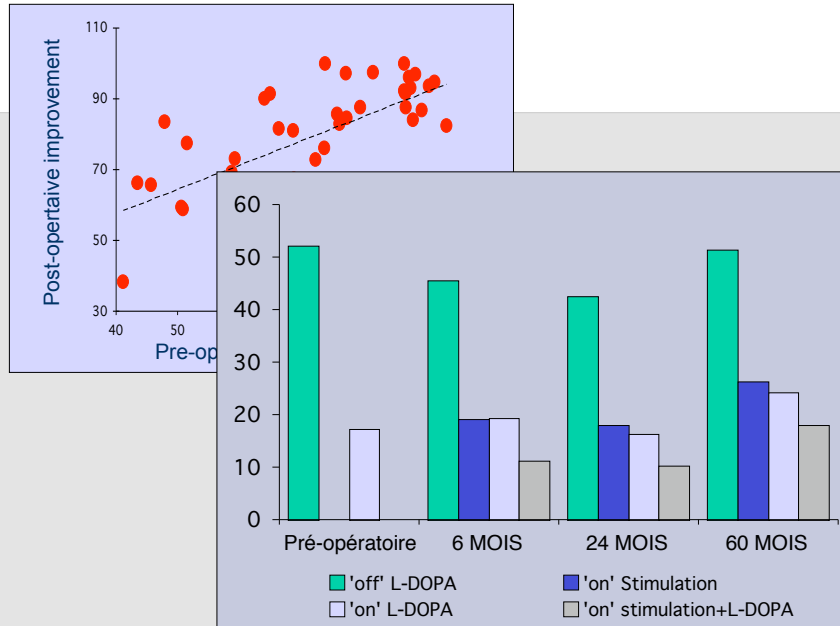

## Axial motor signs

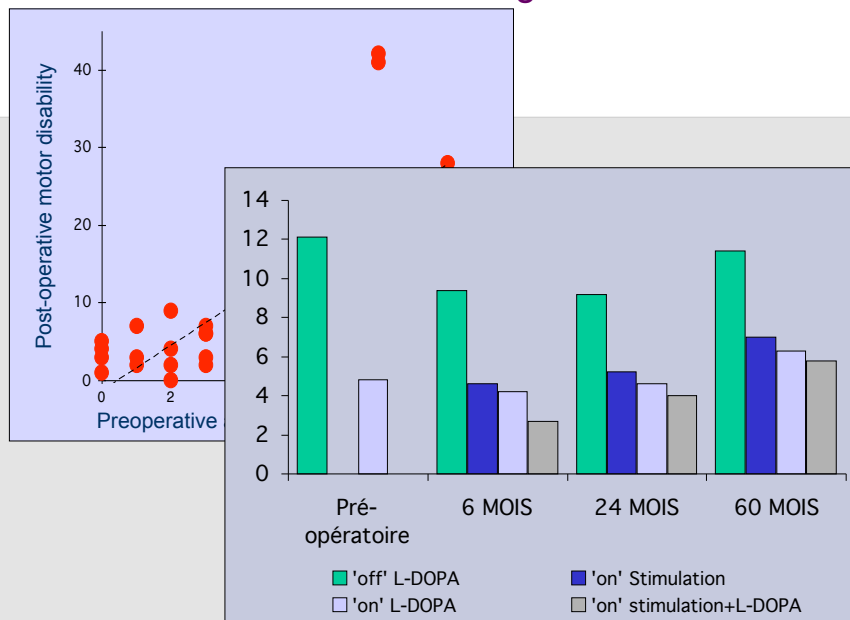

## Predictors of good post-operative outcome

- 1) Young age
- 2) Excellent response to levodopa treatment
- 3) No or few axial motor signs unresponsive to levodopa treatment : gait and balance disorders
- 4) No cognitive decline

## Levodopa related motor complications and drug treatment

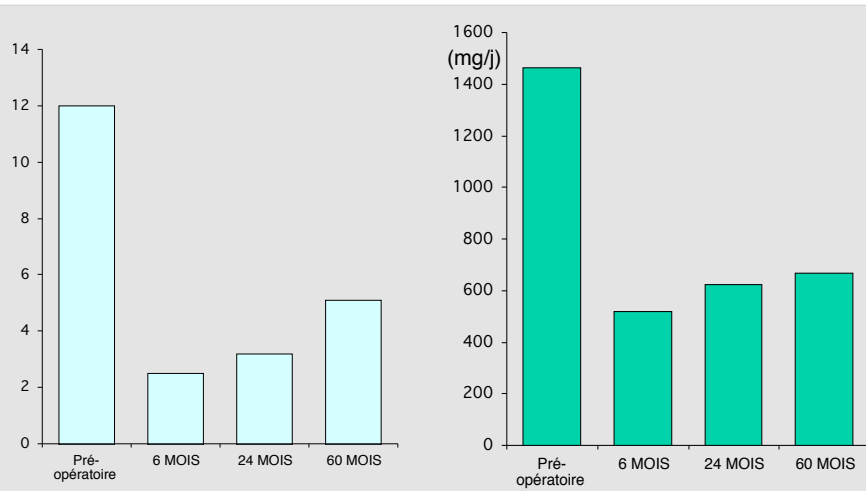

## Quality of life

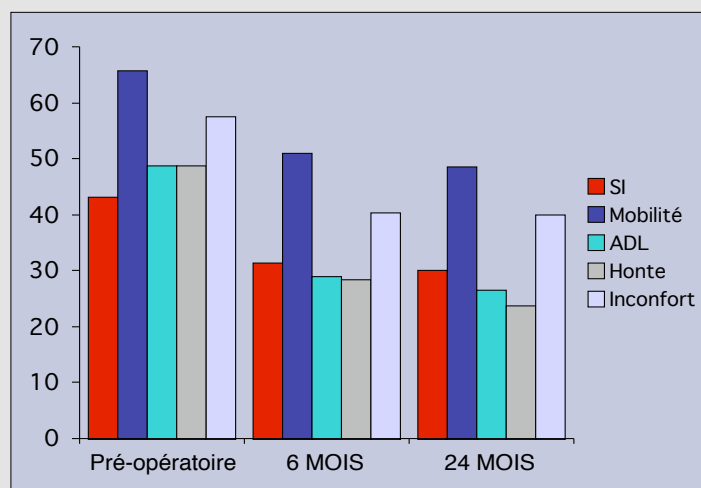

## Depression and Anxiety

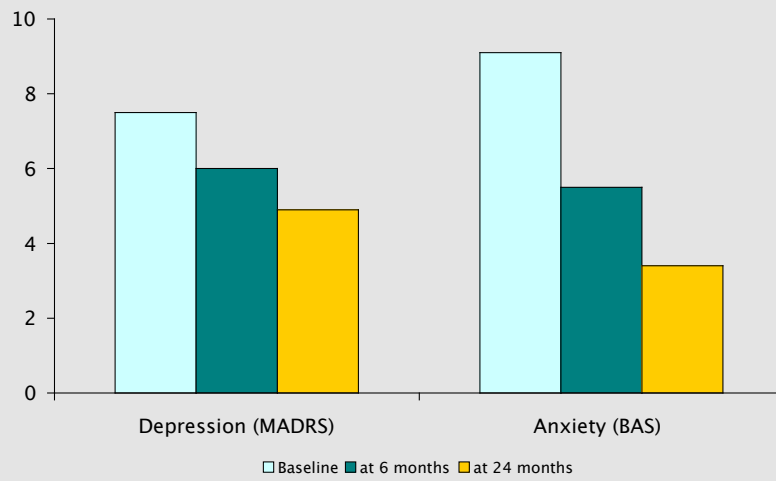

## Social adaptation

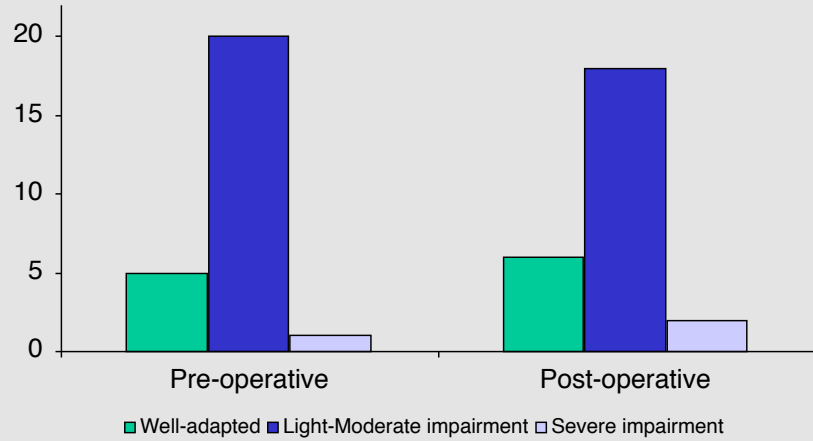

## Side-effects

- Weight gain (+ 5kg)
- Eye lid apraxia
- Apathy
- Hypomania
- Dysarthriae
- Rare
  - Psychiatric decompensation
  - Severe dyskinesias

**Video of a patient with  
apathy, and his spouse**

## Video of a patient with hypomania

### Weaknesses

- Aggravation of axial motor signs
  - Freezing of gait and postural instability
  - Dysarthria
  - Swallowing disorders
  
- No impact on disease progression

## Neurostimulator replacement

- Every 5 to 7 years
- During a short hospitalisation
- Under local anesthesia (if possible)

## Psychoeducation programme Sessions 2-3-4

# **EXPECTATIONS**

## **Social and professional life**

**REALISTIC**

**UNREALISTIC**

**Video of a patient relating  
social difficulties**



**Today, having friends is for me.....**

Very important

Not important at all

---

After surgery, having friends will be for me.....

Very important

Not important at all

---

**Today, working is for me.....**

Very important

Not important at all

---

After surgery, working will be for me.....

Very important

Not important at all

---

# **EXPECTATIONS**

## **Familial life**

**REALISTIC**

**UNREALISTIC**

**Video of a patient relating  
familial difficulties**

**Today, my family life is.....**

Easy

Very difficult

After surgery, my family life will be.....

Easy

Very difficult

## **EXPECTATIONS Life as a Couple**

REALISTIC

UNREALISTIC

**Video of a patient and spouse relating couple difficulties**

**Today, my life as a couple is.....**

Serene

Conflictual

---

After surgery, my life as a couple will be.....

Serene

Conflictual

---
